# Supplementary material
Source: Springer Nature journal article supplement (https://www.springermedizin.de/resource/supplementary/12889_2008_1320_MOESM1_ESM.pdf/9502948)
Supplement: MOESM1 [file 9502948]

1280 with inclusion criteria (aged 40-69, BMI data available in records, no current diabetes):  
900 from Practice A, 380 from Practice B

Risk score 0.19 or over = 355 people,  
**randomly allocated** into invited and non-invited groups

116 invited (57 loss, 59 gain)

238 not invited

1 lost due to developing diabetes  
1 week before study started

95 attend (82%)

21 (18%) not attend

43 (45%) needed fasting appt  
(RCG  $\geq 5/5$ mmol/l)

52 (55%) diabetes-free  
(RCG  $< 5.5$  mmol/l)

37 (86%) attend for fasting appt

6 (14%) not attend

13 (35%) need OGTT  
(FCG  $> 5.5$  and  $< 12$ mmol/l)

23 (62%) have no diabetes  
(FCG  $\leq 5.5$ mmol/l)

1 (3%) has diabetes  
(FCG  $\geq 12$ mmol/l)

5 (39%) have diabetes  
(2hCG  $\geq 11.1$ mmol/l)

8 (62%) have no diabetes  
(2hCG  $< 11.1$ mmol/l)
